# Supplementary material for: Preparation and Characterization of Soft-Hard Block Copolymer of 3,4-IP-b-s-1,2-PBD Using a Robust Iron-Based Catalyst System
Source: MDPI journal article supplement (doi:10.3390/polym16081172), 2024-04-21
Supplement: s1 [file s1]

## Supporting Information

# Preparation and Characterization of Soft-Hard Block Copolymer of 3,4-IP-*b-s*-1,2-PBD Using a Robust Iron-Based Catalyst System

### Table of contents

|                                                                                                                                                    |           |
|----------------------------------------------------------------------------------------------------------------------------------------------------|-----------|
| <b>Figure S1.</b> The additive employed in iron-catalyzed IP polymerization.....                                                                   | <b>S3</b> |
| <b>Figure S2.</b> Comparison of polymerization behavior of three commercially available donors for IP polymerization.....                          | <b>S3</b> |
| <b>Table S1.</b> Variation of temperature and time on IP polymerization.....                                                                       | <b>S3</b> |
| <b>Table S2.</b> Mechanical properties of 3,4-PI, <i>s</i> -1,2-PBD and 3,4-PI- <i>b-s</i> -1,2-PBD with various soft to hard segment lengths..... | <b>S4</b> |
| <b>Table S3.</b> Tan $\delta$ values of 3,4-PI, <i>s</i> -1,2-PBD and representative 3,4-PI- <i>b-s</i> -1,2-PBD (Run 22).....                     | <b>S4</b> |
| <b>Figure S3.</b> GPC profiles of polymers obtained from two-step polymerization of IP.....                                                        | <b>S4</b> |

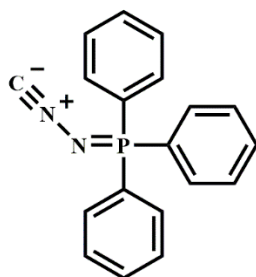

(isocyanoimino) triphenylphosphorane (IITP)

**Figure S1.** The additive employed in iron-catalyzed IP polymerization.

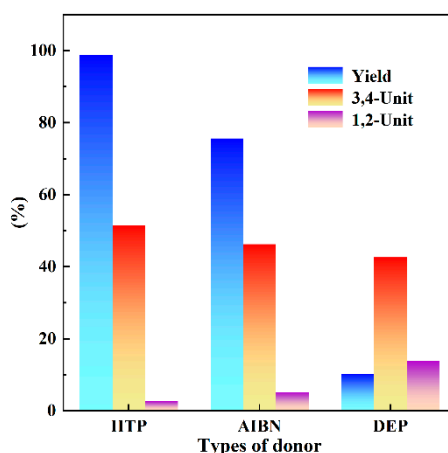

**Figure S2.** Comparison of polymerization behavior of three commercially available donors for IP polymerization. Polymerization conditions: in hexane at 50 °C for 4 h, [IP]=2.3 mol L<sup>-1</sup>, [IP]/[Fe]=7000, [P]/[Fe]=3, and [Al]/[Fe]=20 (mol/mol).

**Table S1.** Variation of temperature and time on IP polymerization <sup>a</sup>

| Run | Temp.<br>(°C) | Time<br>(h) | Yield<br>(%) | Activity<br><sup>b</sup> | $M_n^c$<br>( $\times 10^4$ ) | PDI<br><sup>c</sup> | Microstructure <sup>d</sup> |     |      | $T_g^e$<br>(°C) |
|-----|---------------|-------------|--------------|--------------------------|------------------------------|---------------------|-----------------------------|-----|------|-----------------|
|     |               |             |              |                          |                              |                     | (%)                         |     |      |                 |
|     |               |             |              |                          |                              |                     | 3,4                         | 1,2 | 1,4  |                 |
| 1   | 0             | 24          | 7.9          | 3.4                      | 29.2                         | 1.64                | 54.6                        | 2.2 | 43.2 | −15.8           |
| 2   | 10            | 2           | 4.0          | 20.4                     | 22.6                         | 1.90                | 54.1                        | 2.5 | 43.5 | −14.5           |
| 3   | 20            | 2           | 13.9         | 70.9                     | 45.6                         | 1.77                | 52.7                        | 2.6 | 44.7 | −16.3           |
| 4   | 30            | 2           | 81.5         | 415.7                    | 63.7                         | 1.77                | 52.7                        | 2.5 | 44.9 | −16.3           |
| 5   | 50            | 0.6         | 79.9         | 1358.3                   | 76.6                         | 1.95                | 49.7                        | 3.7 | 46.7 | −16.8           |
| 6   | 50            | 2           | 96.7         | 493.2                    | 90.4                         | 1.93                | 51.3                        | 3.3 | 45.4 | −16.8           |
| 7   | 70            | 0.15        | 79.5         | 5406.0                   | 81.6                         | 1.88                | 49.5                        | 3.8 | 46.7 | −17.5           |
| 8   | 70            | 0.25        | 92.7         | 3782.2                   | 74.6                         | 1.92                | 49.8                        | 3.5 | 46.7 | −17.2           |

<sup>a</sup> Polymerization conditions: in hexane, [IP]=2.3 mol L<sup>-1</sup>, [IP]/[Fe]=15000, [P]/[Fe]=3, and [Al]/[Fe]=20 (mol/mol); <sup>b</sup> Activity in units of g mol<sub>(Fe)</sub><sup>-1</sup> h<sup>-1</sup>; <sup>c</sup> Determined by GPC (using polystyrene as calibration); <sup>d</sup> Determined by NMR; <sup>e</sup> Determined by DSC.

**Table S2.** Mechanical properties of 3,4-PI, *s*-1,2-PBD and 3,4-PI-*b*-*s*-1,2-PBD with various soft to hard segment lengths.

| Samples | Tensile strength (MPa) | Elongation at break (%) |
|---------|------------------------|-------------------------|
| Run 19  | 0.58±0.09              | 586±39                  |
| Run 20  | 4.75±0.12              | 579±14                  |
| Run 21  | 5.83±0.26              | 492±31                  |
| Run 22  | 7.46±0.24              | 434±27                  |
| Run 23  | 8.66±0.12              | 400±19                  |
| Run 24  | 13.36±0.13             | 348±25                  |

**Table S3.** Tan  $\delta$  values of 3,4-PI, *s*-1,2-PBD and representative 3,4-PI-*b*-*s*-1,2-PBD (Run 22).

| Samples | Tan $\delta$ at 0°C | Tan $\delta$ at 60°C |
|---------|---------------------|----------------------|
| Run 19  | 2.278               | 0.032                |
| Run 20  | 1.635               | 0.048                |
| Run 24  | 0.211               | 0.088                |

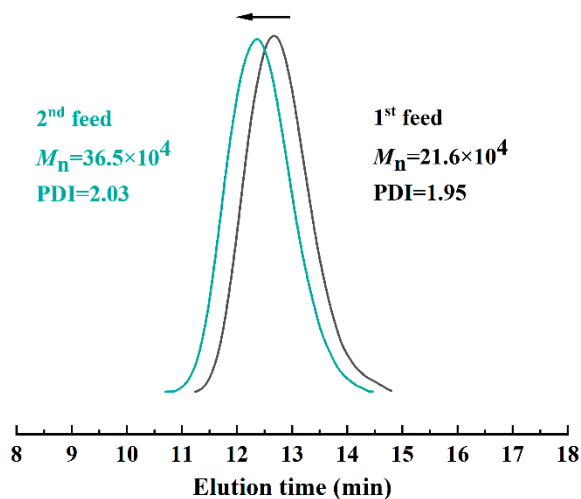

**Figure S3.** GPC profiles of polymers obtained from two-step polymerization of IP. Polymerization conditions: in hexane,  $[IP]_0 = 0.5 \text{ mol L}^{-1}$ ,  $[IP]_0/[Fe] = 600$ ,  $[P]/[Fe] = 3$ ,  $[Al]/[Fe] = 20$ , and  $[IP]_{\text{total}}/[Fe] = 1200 \text{ (mol/mol)}$ .
